# Supplementary material for: Circulating miR-27a-3p as a candidate for a biomarker of whole grain diets for lipid metabolism
Source: Royal Society of Chemistry journal article supplement (doi:10.1039/d0fo00830c), 2020-01-01

Table S1. Compositions of Experimental Diets

|                         | <b>CS</b> | <b>BR</b> | <b>WW</b> |
|-------------------------|-----------|-----------|-----------|
| <b>Component</b>        |           |           |           |
| Casein, g               | 200       | 157.93    | 117.49    |
| Corn starch, g          | 417.486   | -         | -         |
| Brown rice flour, g     | -         | 434.5     | -         |
| Whole wheat flour, g    | -         | -         | 547.9     |
| Dextrin, g              | 132.0     | 132.0     | 132.0     |
| Sucrose, g              | 80.0      | 80.0      | 80.0      |
| Soy bean oil, g         | 70.0      | 60.9      | 58.3      |
| Cellulose, g            | 50.0      | 38.7      | 22.4      |
| AIN-93G-MX, g           | 35.0      | 35.0      | 35.0      |
| AIN-93-VX, g            | 10.0      | 10.0      | 10.0      |
| L-Cysteine, g           | 3.0       | 3.0       | 3.0       |
| t-BHQ, g                | 0.014     | 0.014     | 0.014     |
| Choline bitartrate, g   | 2.5       | 2.5       | 2.5       |
| Total mass, g           | 1000      | 954.510   | 1008.612  |
| <b>Content</b>          |           |           |           |
| Protein, g              | 182.8     | 182.8     | 182.8     |
| Total fat, g            | 70.7      | 70.7      | 70.7      |
| Carbohydrate, g         | 569.7     | 569.7     | 569.7     |
| Dietary fiber, g        | 54.93     | 54.93     | 54.93     |
| Soluble Fiber, g        | 0.13      | 3.87      | 6.74      |
| Insoluble Fiber, g      | 54.80     | 51.06     | 48.19     |
| Starch, g               | 347.2     | 347.2     | 347.2     |
| <b>Energy</b>           |           |           |           |
| Protein, kcal, %        | 731, 20%  | 731, 20%  | 731, 20%  |
| Total fat, kcal (%)     | 636, 17%  | 636, 17%  | 636, 17%  |
| Carbohydrate, kcal, %   | 2279, 63% | 2279, 63% | 2279, 63% |
| Total energy, kcal      | 3646      | 3646      | 3646      |
| Caloric density, kcal/g | 3.646     | 3.820     | 3.615     |

Table S2. Primer Sequences for qRT-PCR

| <b>Gene</b>   | <b>Sense Sequence (5' → 3')</b>              | <b>Antisense Sequence (5' → 3')</b> |
|---------------|----------------------------------------------|-------------------------------------|
| miR-27a-3p-RT | CTCAACTGGTGTCGTGGAGTCGGCAATTCAGTTGAGGCGGAACT |                                     |
| U6-RT         | CTCAACTGGTGTCGTGGAGTCGGCAATTCAGTTGAGAAAATATG |                                     |
| miR-27a-3p    | ACACTCCAGCTGGGTTACAGTGGCTA                   | CTCAAGTGTCGTGGAGTCGGCAA             |
| U6            | ACACTCCAGCTGGGCGCAAATTCGTGAAGC               | CTCAAGTGTCGTGGAGTCGGCAA             |
| HMGCR         | AGCTTGCCCGAATTGTATGTG                        | TCTGTTGTGAACCATGTGACTTC             |
| FASN          | GGAGGTGGTGATAGCCGGTAT                        | TGGGTAATCCATAGAGCCCAG               |
| GAPDH         | ACATCATCCCTGCATCCACT                         | GTCCTCAGTGTAGCCCAAG                 |

Table S3. The KEGG Pathway Analysis of Differentially Expressed MiRNAs

| KEGG pathway                           | <i>p</i> -value | genes | miRNAs |
|----------------------------------------|-----------------|-------|--------|
| Prion diseases                         | <1e-325         | 1     | 1      |
| Mucin type O-Glycan biosynthesis       | 1.11E-16        | 11    | 4      |
| Fatty acid biosynthesis                | 1.06E-06        | 1     | 1      |
| Hippo signaling pathway                | 0.000113013     | 24    | 3      |
| Proteoglycans in cancer                | 0.000178006     | 49    | 3      |
| Lysine degradation                     | 0.002269397     | 14    | 4      |
| Axon guidance                          | 0.002277791     | 26    | 3      |
| Adrenergic signaling in cardiomyocytes | 0.005772829     | 6     | 1      |
| MAPK signaling pathway                 | 0.00788276      | 76    | 4      |
| Gap junction                           | 0.009062834     | 5     | 3      |
| Fatty acid metabolism                  | 0.01199174      | 6     | 2      |
| ErbB signaling pathway                 | 0.01333858      | 26    | 3      |
| Phosphatidylinositol signaling system  | 0.01470084      | 23    | 4      |
| Amphetamine addiction                  | 0.02234281      | 16    | 3      |
| mTOR signaling pathway                 | 0.03044699      | 17    | 2      |
| Thyroid hormone synthesis              | 0.04628612      | 7     | 2      |

The KEGG pathway of screened 16 miRNAs was analyzed by DIANA-miRPath v3.0, using “pathways union”, microT-CDS (*P*-value threshold 0.05, microT threshold 0.7, Fisher’s exact test (Hypergeometric distribution)) and FDR correction.

Table S4. The GO Category Analysis of Differentially Expressed MiRNAs

| <b>GO category</b>                                       | <b><i>p</i>-value</b> | <b>genes</b> | <b>miRNAs</b> |
|----------------------------------------------------------|-----------------------|--------------|---------------|
| Nucleic acid binding transcription factor activity       | 0                     | 280          | 8             |
| Chromosome organization                                  | 0                     | 202          | 8             |
| Cell motility                                            | 0                     | 218          | 9             |
| Cellular protein modification process                    | 0                     | 782          | 10            |
| Biosynthetic process                                     | 0                     | 1073         | 10            |
| Anatomical structure formation involved in morphogenesis | 0                     | 308          | 11            |
| Cell morphogenesis                                       | 0                     | 271          | 12            |
| Cellular_component                                       | 0                     | 5636         | 13            |
| Cellular nitrogen compound metabolic process             | 0                     | 1384         | 13            |
| Embryo development                                       | 0                     | 412          | 14            |
| Ion binding                                              | 0                     | 2085         | 14            |
| Molecular_function                                       | 0                     | 5938         | 15            |
| Biological_process                                       | 0                     | 6076         | 15            |
| Organelle                                                | 0                     | 3212         | 15            |
| Intracellular                                            | 0                     | 3840         | 16            |
| Cell                                                     | 0                     | 4427         | 16            |
| Cell differentiation                                     | 0                     | 1080         | 16            |
| Anatomical structure development                         | 0                     | 1472         | 16            |
| Nuclear chromosome                                       | 3.46E-08              | 72           | 5             |
| Developmental maturation                                 | 1.95E-07              | 58           | 6             |
| Cell division                                            | 1.77E-05              | 132          | 4             |
| Growth                                                   | 2.20E-05              | 96           | 4             |
| Homeostatic process                                      | 8.41E-05              | 116          | 2             |
| Cell cycle                                               | 0.002369              | 196          | 4             |
| Chromosome                                               | 0.007266              | 78           | 2             |
| Cytoskeleton organization                                | 0.007573              | 84           | 2             |
| Cytoskeleton                                             | 0.077962              | 161          | 2             |
| Protein complex                                          | 0.079994              | 273          | 1             |
| Cellular component assembly                              | 0.312578              | 77           | 1             |

|                                                                                                  |          |    |   |
|--------------------------------------------------------------------------------------------------|----------|----|---|
| Protein binding transcription factor activity                                                    | 0.160368 | 37 | 1 |
| Cytoplasmic membrane-bounded vesicle                                                             | 0.530892 | 29 | 1 |
| Positive regulation of nuclear-transcribed mRNA catabolic process, deadenylation-dependent decay | 0.565781 | 7  | 2 |
| Transcription, DNA-templated                                                                     | 0.715054 | 74 | 1 |
| Positive regulation of nuclear-transcribed mRNA poly(A) tail shortening                          | 0.809769 | 2  | 1 |
| Positive regulation of cytoplasmic mRNA processing body assembly                                 | 0.871556 | 4  | 1 |
| Positive regulation of transcription, DNA-templated                                              | 0.893988 | 34 | 1 |
| Nucleoplasm                                                                                      | 0.917562 | 89 | 1 |
| Micro-ribonucleoprotein complex                                                                  | 0.929023 | 4  | 1 |
| Poly(A)-specific ribonuclease activity                                                           | 0.96335  | 5  | 1 |
| Golgi to lysosome transport                                                                      | 0.975785 | 3  | 1 |
| Behavioral fear response                                                                         | 0.991812 | 11 | 1 |
| Nuclear speck                                                                                    | 0.993689 | 11 | 1 |
| High voltage-gated calcium channel activity                                                      | 0.997613 | 4  | 1 |
| Positive regulation of neuron migration                                                          | 0.998684 | 3  | 1 |
| Positive regulation of NIK/NF-kappaB signaling                                                   | 0.998739 | 3  | 1 |
| Positive regulation of cellular senescence                                                       | 0.999209 | 3  | 1 |
| Positive regulation of natural killer cell degranulation                                         | 0.999394 | 2  | 1 |
| Response to osmotic stress                                                                       | 0.99946  | 2  | 1 |
| Regulation of aldosterone metabolic process                                                      | 0.999986 | 1  | 1 |
| Mitral valve morphogenesis                                                                       | 0.999602 | 3  | 1 |
| Oncogene-induced cell senescence                                                                 | 0.999953 | 3  | 1 |

|                  |          |   |   |
|------------------|----------|---|---|
| Eye blink reflex | 0.999986 | 1 | 1 |
|------------------|----------|---|---|

---

The GO enrichment of screened 16 miRNAs was analyzed by DIANA-miRPath v3.0, using “categories union”, microT-CDS (*P*-value threshold 0.05, microT threshold 0.7, Fisher’s exact test (Hypergeometric distribution)) and FDR correction.

Table S5 The GO Category Analysis of MiR-27a-3p

| GO Category                                                                                      | <i>p</i> -value | Genes |
|--------------------------------------------------------------------------------------------------|-----------------|-------|
| Cell                                                                                             | 1.79E-244       | 1088  |
| Intracellular                                                                                    | 2.49E-98        | 942   |
| Anatomical structure development                                                                 | 2.82E-70        | 412   |
| Cell differentiation                                                                             | 6.86E-39        | 307   |
| BCiological_process                                                                              | 1.22E-33        | 1522  |
| Ion binding                                                                                      | 3.36E-26        | 575   |
| Embryo development                                                                               | 1.21E-24        | 124   |
| Molecular_function                                                                               | 7.80E-19        | 1499  |
| Organelle                                                                                        | 3.01E-14        | 792   |
| Anatomical structure formation involved in morphogenesis                                         | 4.81E-14        | 98    |
| Cell morphogenesis                                                                               | 6.27E-14        | 90    |
| Chromosome organization                                                                          | 1.36E-11        | 73    |
| Cellular protein modification process                                                            | 1.90E-11        | 228   |
| Growth                                                                                           | 3.65E-07        | 58    |
| Nucleic acid binding transcription factor activity                                               | 6.22E-07        | 105   |
| Cellular nitrogen compound metabolic process                                                     | 1.23E-06        | 372   |
| biosynthetic process                                                                             | 1.46E-05        | 325   |
| Cell motility                                                                                    | 4.70E-05        | 67    |
| Cellular_component                                                                               | 0.002310799     | 1445  |
| Developmental maturation                                                                         | 0.013205738     | 19    |
| Positive regulation of nuclear-transcribed mRNA catabolic process, deadenylation-dependent decay | 0.021676564     | 7     |
| Cell division                                                                                    | 0.034732922     | 49    |
| Nuclear chromosome                                                                               | 0.047887641     | 25    |

The GO enrichment of miR-27a-3p was analyzed by DIANA-miRPath v3.0, using “categories union”, microT-CDS (*P*-value threshold 0.05, microT threshold 0.7, Fisher’s exact test (Hypergeometric distribution)) and FDR correction.

Figure S1. The Different Expressions of MiR-690 in Different Tissues with the Treatment of Whole Grain Diets.

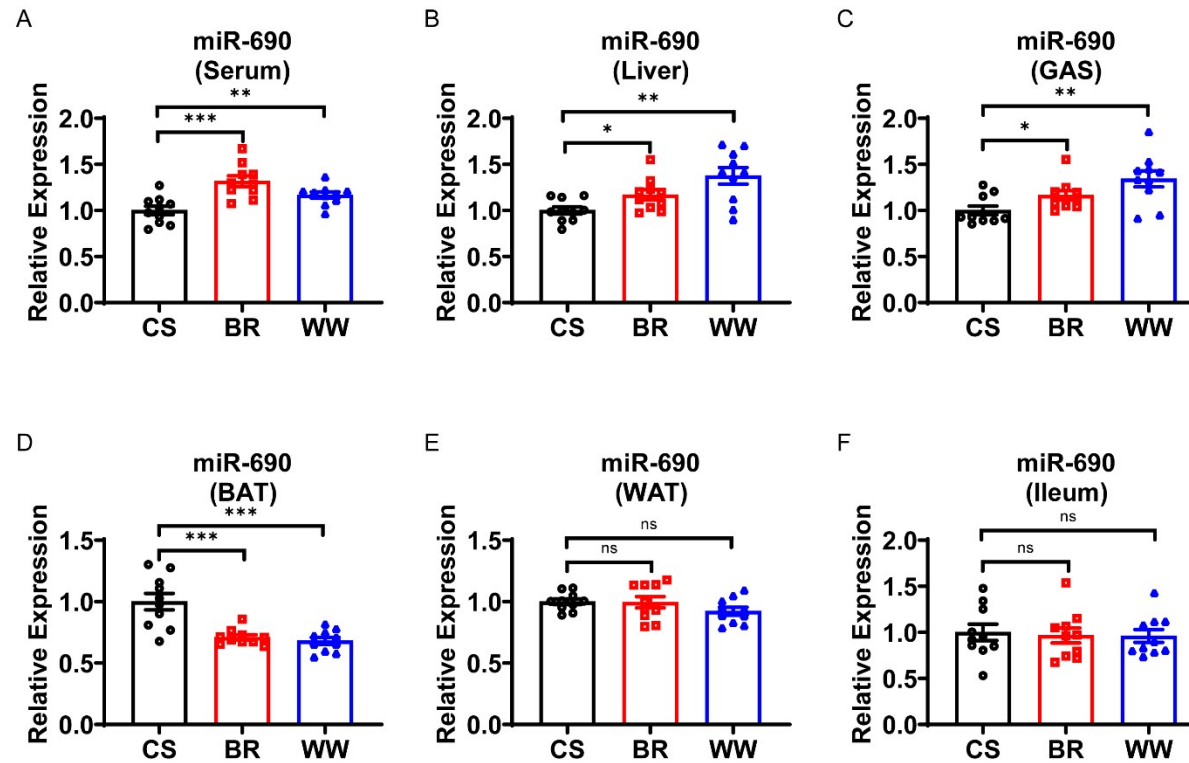

The different levels of miR-690 in serum (A), liver (B), GAS (C), BAT (D), WAT (E) and ileum (F) were analyzed by qRT-PCR in mice. Data are expressed as the mean  $\pm$  SD,  $n=10$ . \* $p < 0.05$  versus CS, \*\* $p < 0.01$  versus CS; \*\*\* $p < 0.001$  versus CS; ns, no significant (Student's t-test). CS: corn starch group; BR: brown rice group; WW: whole wheat group.



Figure S2. The Relative Levels of Has-miR-27a-3p in Different Tissues

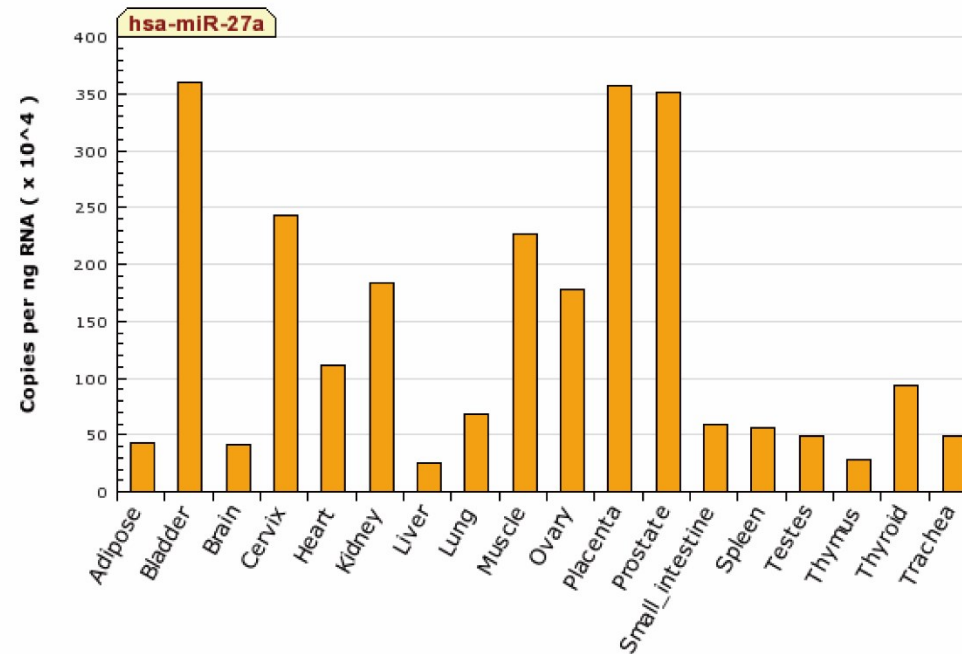

The relative levels of miR-27a-3p were calculated and distributed in different human tissues using online database-miRNAMap (<http://mirnamap.mbc.nctu.edu.tw/>), which integrated two data sets of miRNA expression profiles, which were obtained by different experimental methods including quantitative polymerase chain reaction and miRNA-bead array.

Figure S3. Uncropped Scans of the Western Blots Shown in Figures as Indicated.

Fig. 6D HMGCR

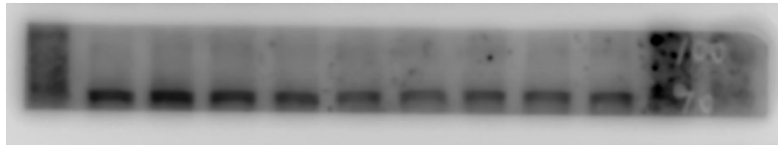

Fig. 6D FASN

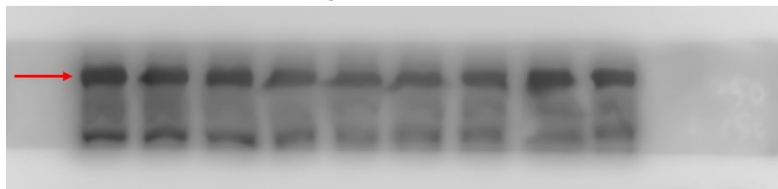

Fig. 6D GAPDH

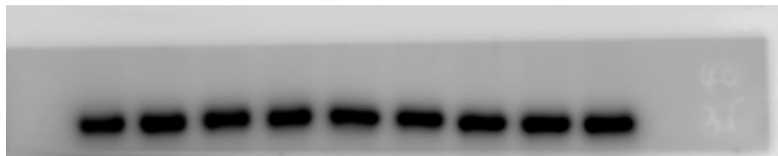

Fig. 6G HMGCR

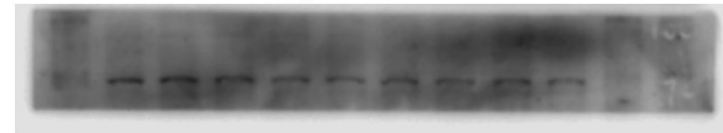

Fig. 6G FASN

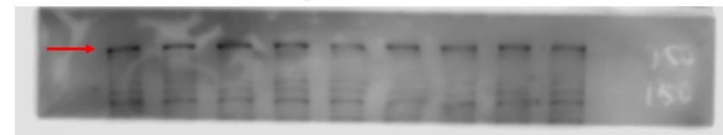

Fig. 6G GAPDH

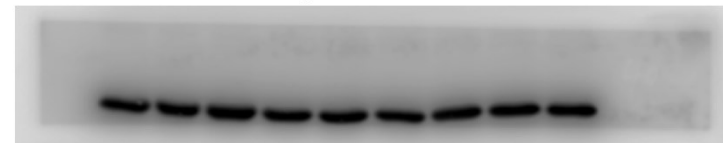

Supplement: d0fo00830c1.pdf [file d0fo00830c1.pdf]
